# Supplementary material for: Significantly improving mechanical, thermal and dielectric properties of cyanate ester resin through building a new crosslinked network with unique polysiloxane@polyimide core–shell microsphere
Source: Royal Society of Chemistry journal article supplement (doi:10.1039/c6ra02090a), 2016-01-01
Supplement: c6ra02090a1.pdf [file c6ra02090a1.pdf]

## Electronic Supplementary Information

**Significantly improving mechanical, thermal and dielectric properties of cyanate ester resin through building new crosslinked network with unique polysiloxane@polyimide core-shell microsphere**

**Xinyi Dong, Li Yuan, Guozheng Liang,\* and Aijuan Gu\***

Jiangsu Key Laboratory of Advanced Functional Polymer Design and Application

Department of Materials Science and Engineering

College of Chemistry, Chemical Engineering and Materials Science

Soochow University, Suzhou 215123, China

\*To whom all correspondence should be addressed

Tel: +86 512 65880967

Fax: +86 512 65880089

Email: lgzheng@suda.edu.cn (Guozheng Liang), ajgu@suda.edu.cn (Aijuan Gu),

**Table S1** Typical toughened TR systems in literature <sup>a)</sup>

| System <sup>b)</sup> | Filler content (%) | Impact strength (kJ/m <sup>2</sup> ) | Fracture toughness (MPam <sup>1/2</sup> ) | T <sub>g</sub> (°C) | Storage modulus (GPa) <sup>c)</sup> | Flexural/tensile modulus (GPa) | Reference |
|----------------------|--------------------|--------------------------------------|-------------------------------------------|---------------------|-------------------------------------|--------------------------------|-----------|
| PSi@EP/EP            | 0                  | -----                                | 0.7                                       | 148                 | 2.6                                 | 3.19                           | S1        |
|                      | 10                 | -----                                | 1.31                                      | 147                 | 2                                   | 1.96                           |           |
| PSi@EP/EP            | 0                  | 22.5                                 | 2.17                                      | 60                  | 25                                  | 0.88                           | S2        |
|                      | 5                  | 55.8                                 | 2.81                                      | 58                  | 16                                  | 0.79                           |           |
| cPES/CE              | 0                  | 17                                   | -----                                     | 298                 | -----                               | 2.53                           | S3        |
|                      | 10                 | 24                                   | -----                                     | 290                 | -----                               | 2.85                           |           |
| HBPSiEP/CE           | 0                  | 9                                    | -----                                     | 295                 | -----                               | -----                          | S4        |
|                      | 30                 | 23                                   | -----                                     | 271                 | -----                               | -----                          |           |
| EPMPS/CE             | 0                  | 6.1                                  | -----                                     | 287                 | -----                               | -----                          | S5        |
|                      | 15                 | 17.8                                 | -----                                     | 275                 | -----                               | -----                          |           |
| CRBN/CE              | 0                  | 4.4                                  | -----                                     | -----               | -----                               | 52                             | S6        |
|                      | 8                  | 13.5                                 | -----                                     | -----               | -----                               | 48                             |           |
| PSi@PI/CE            | 0                  | 15.5                                 | 0.51                                      | 278                 | 1.93                                | 2.47                           | This work |
|                      | 2                  | 28.0                                 | 0.88                                      | 281                 | 1.97                                | 2.60                           |           |

a) The data contain best comprehensive properties and the properties of pure resins; symbol “-----” means the data are not mentioned in paper.

b) PSi@EP: Polysiloxane@epoxy core-shell microspheres;

EP: Epoxy resin;

cPES: Phenolphthalein type polyarylether sulfone;

CE: Cyanate ester;

HBPSiEP: Consisting of hyperbranched polysiloxane and epoxy resin;

EPMPS: Epoxidized methyl phenyl silicone resin;

CRBN: Carboxyl-randomized liquid butadiene-acrylonitrile rubber

c) The storage modulus at 50 °C.

## References

- [S1] J. Chen, A. J. Kinloch, S. Sprenger and A. C. Taylor, *Polymer*, 2013, **54**, 4276.
- [S2] P. K. Roy, N. Iqbal, D. Kumar and C. Rajagopal, *J. Polym. Res.*, 2014, **21**, 1.
- [S3] L. Zhao, L. Yuan, G. Z. Liang and A. J. Gu, *RSC Adv.*, 2015, **5**, 58989.
- [S4] C. Zhou, A. J. Gu, G. Z. Liang and L. Yuan, *Polym. Adv. Technol.*, 2011, **22**, 710.
- [S5] S. K. Dai, A. J. Gu, G. Z. Liang and L. Yuan, *Polym. Adv. Technol.*, 2011, **22**, 262.
- [S6] M. F. Zeng, X. D. Sun, X. Dong. Yao, Y. Wang, M. Z. Zhang and B. Y. Wang, *J. Mater. Sci.*, 2009, **44**, 4270.
